# Supplementary material for: Integrative Analysis of DNA Methylation Identified 12 Signature Genes Specific to Metastatic ccRCC
Source: PubMed Central journal article supplement (PMC7578385; doi:10.3389/fonc.2020.556018), 2020-10-08
Supplement: Image_1.pdf [file Image_1.pdf]

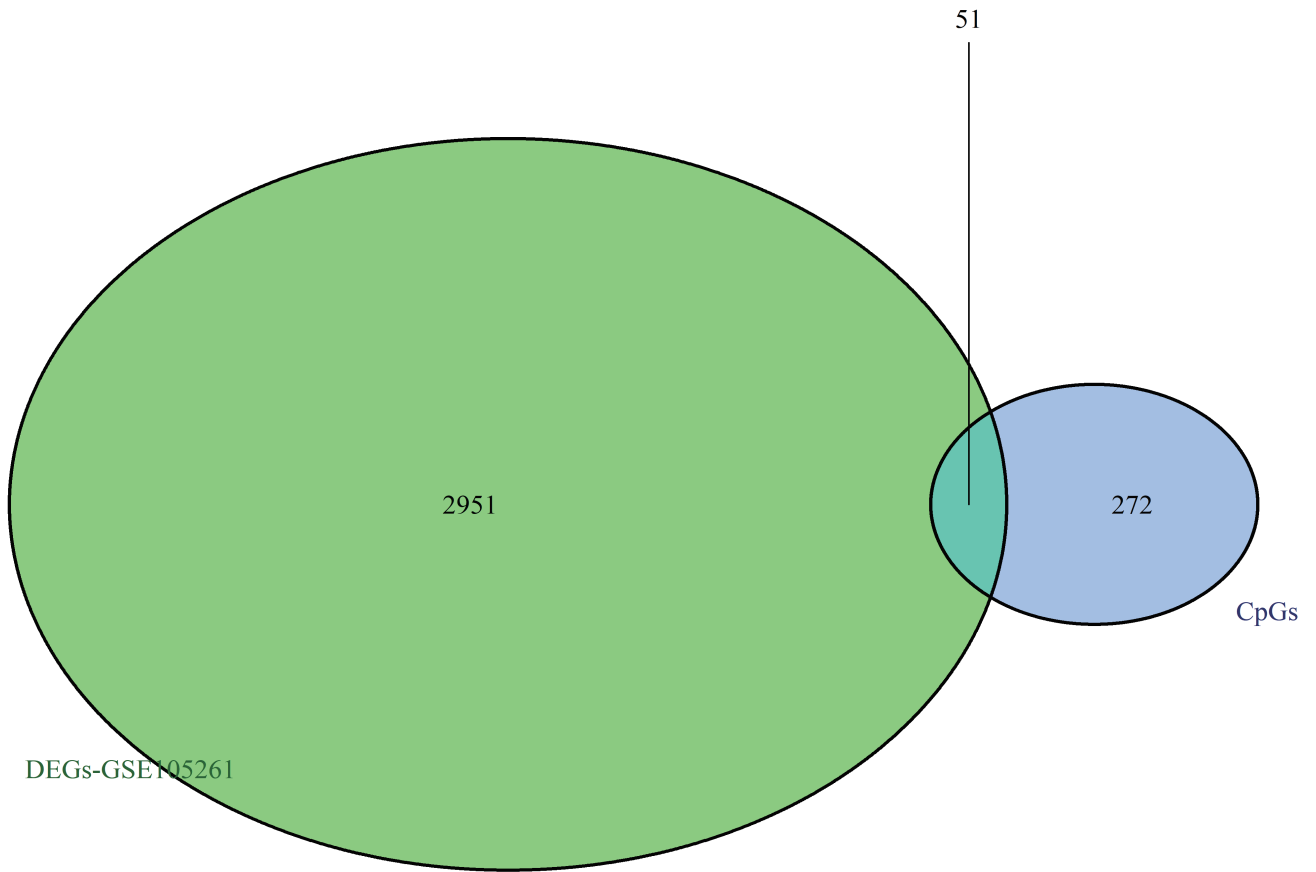

**Supplementary figure 1** Venn diagram of overlapping genes among the DMGs based on different regions from GEOdataset GSE105260 and DEGs screened from GEO (GSE105261) dataset.
