# Supplementary material for: Integrative Analysis of DNA Methylation Identified 12 Signature Genes Specific to Metastatic ccRCC
Source: PubMed Central journal article supplement (PMC7578385; doi:10.3389/fonc.2020.556018), 2020-10-08
Supplement: Image_4.pdf [file Image_4.pdf]

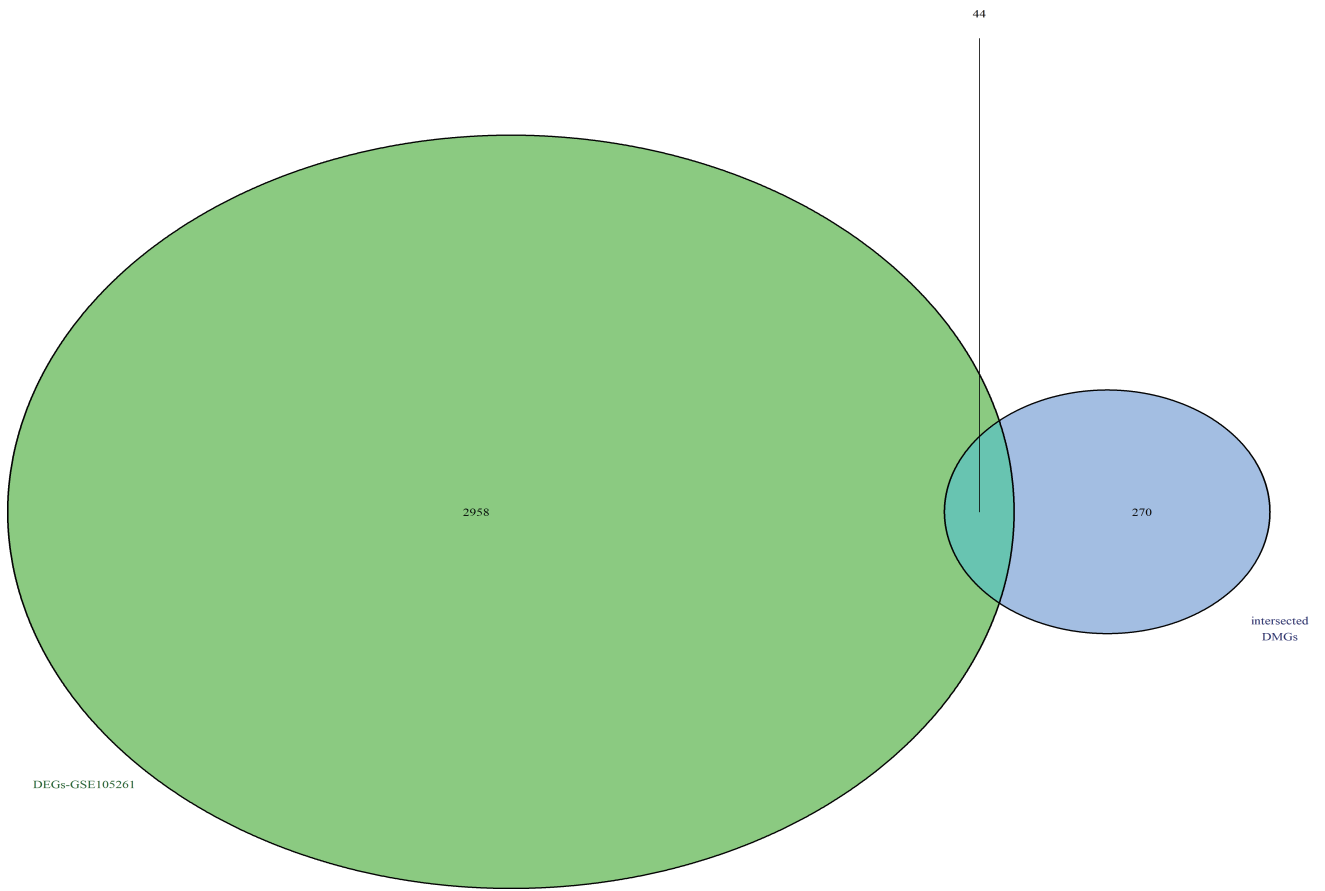

**Supplementary figure 4** Venn diagram of overlapping genes among the intersected DMGs based on all regions and DEGs screened from GEOdataset GSE105261.
