# Supplementary material for: Integrative Analysis of DNA Methylation Identified 12 Signature Genes Specific to Metastatic ccRCC
Source: PubMed Central journal article supplement (PMC7578385; doi:10.3389/fonc.2020.556018), 2020-10-08
Supplement: Image_5.pdf [file Image_5.pdf]

**Intersected genes**

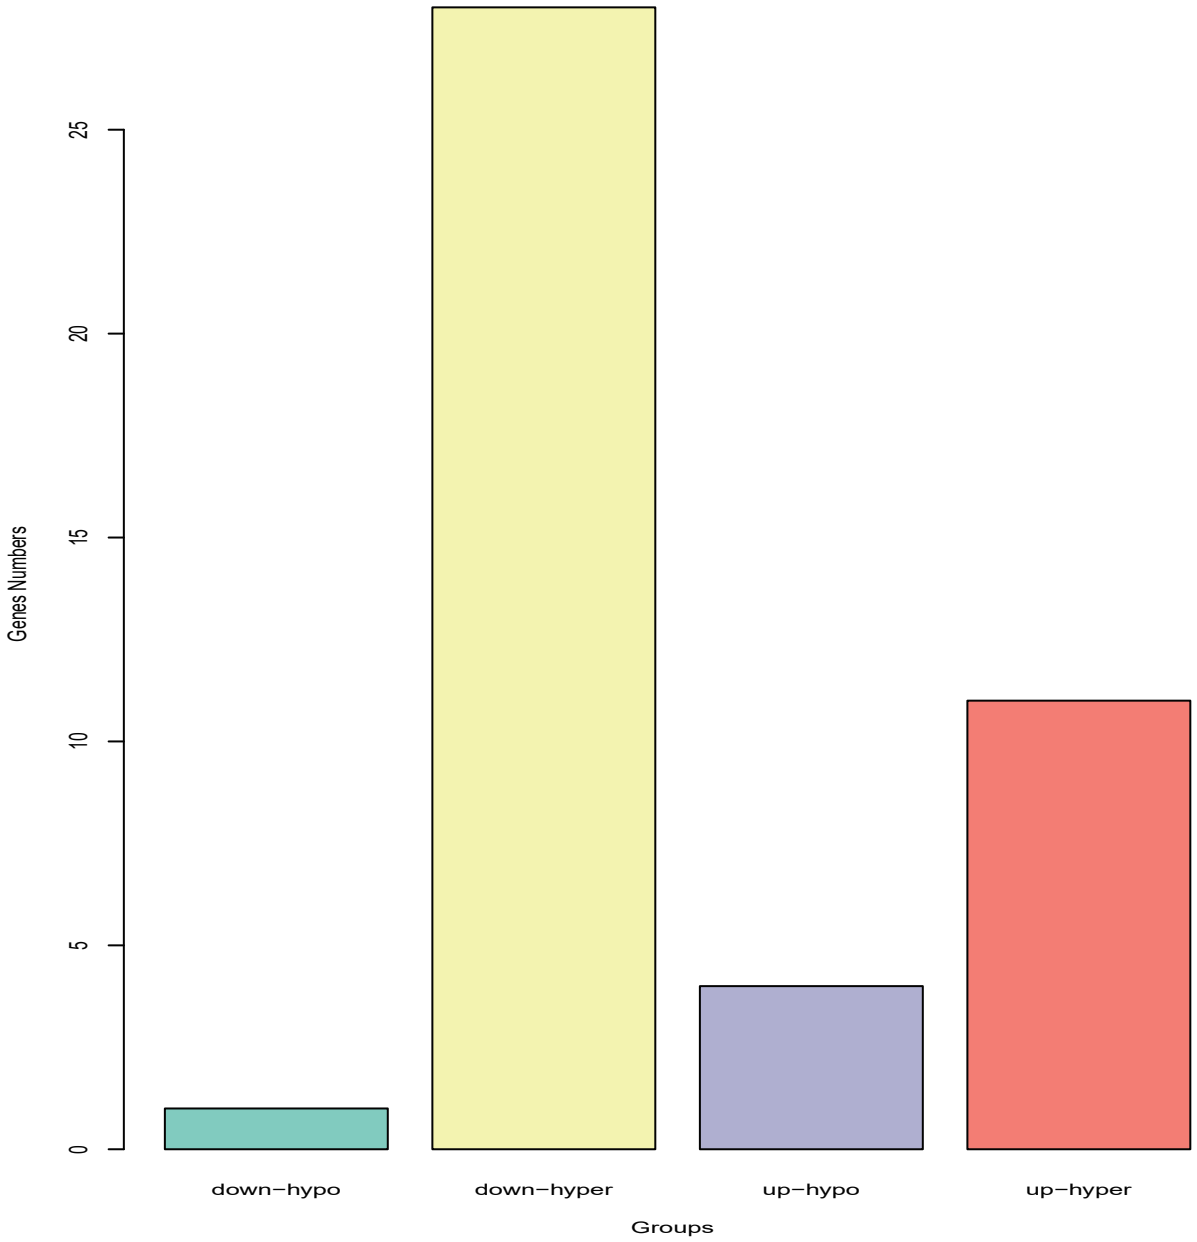

**Supplementary figure 5** Characteristics of intersected genes between DEGs from GSE105261 and DMGs based on all region CpGs from GSE105260. **a** Barplot for four groups of intersected genes. Down-hyper represents downregulated and hyper-methylated genes. Up-hypo represents upregulated and hypo-methylated genes. Up-hyper represents upregulated and hyper-methylated genes. Down-hypo represents downregulated hypo-methylated genes. The y-axis is the number of genes.
