# Supplementary material for: Integrative Analysis of DNA Methylation Identified 12 Signature Genes Specific to Metastatic ccRCC
Source: Front Oncol. 2020 Oct 8;10:556018. doi: 10.3389/fonc.2020.556018 (PMC7578385; doi:10.3389/fonc.2020.556018)
Supplement: Supplementary file 10 [file Table_10.XLSX]

## Sheet: KEGG
Category	Term	Count	%	PValue	Genes	List Total	Pop Hits	Pop Total	Fold Enrichment	Bonferroni	Benjamini	FDR
KEGG_PATHWAY	hsa01100:Metabolic pathways	25	0.0586841	0.0552575	ATP5E, LDHA, HMGCR, CYC1, ALG5, PMVK, GMPPB, ATP6V0C, TYMP, TPI1, DAD1, PHOSPHO1, ATP5O, GAPDH, INPP5A, COX15, SHMT2, HYAL3, NDUFA6, CYP26A1, LPCAT4, APRT, PYGL, LTA4H, IDI1	99	1219	6879	1.42504	0.999737	0.691939	49.0749
KEGG_PATHWAY	hsa04110:Cell cycle	9	0.0211263	0.00036	CDC7, MAD1L1, YWHAH, CDKN2C, SMAD4, MDM2, CDC20, CCNA2, TFDP1	99	124	6879	5.04326	0.0509261	0.0509261	0.427025
KEGG_PATHWAY	hsa05016:Huntington's disease	9	0.0211263	0.0058659	ATP5E, SLC25A31, NDUFA6, DNAH17, CYC1, CYCS, ATP5O, SOD1, VDAC3	99	192	6879	3.2571	0.573891	0.247499	6.74595
KEGG_PATHWAY	hsa05203:Viral carcinogenesis	9	0.0211263	0.00860323	MAD1L1, YWHAH, HIST1H4A, HDAC10, MDM2, CDC20, VDAC3, CCNA2, SRF	99	205	6879	3.05055	0.714315	0.268908	9.74904
KEGG_PATHWAY	hsa05012:Parkinson's disease	7	0.0164315	0.0155064	ATP5E, SLC25A31, NDUFA6, CYC1, CYCS, ATP5O, VDAC3	99	142	6879	3.42531	0.896279	0.364415	16.9335
KEGG_PATHWAY	hsa01130:Biosynthesis of antibiotics	7	0.0164315	0.0813388	SHMT2, LDHA, TPI1, HMGCR, TGDS, IDI1, GAPDH	99	212	6879	2.29431	0.999995	0.785122	63.4746
KEGG_PATHWAY	hsa00190:Oxidative phosphorylation	6	0.0140842	0.0408007	ATP6V0C, ATP5E, NDUFA6, CYC1, ATP5O, COX15	99	133	6879	3.13465	0.997619	0.634576	39.0142
KEGG_PATHWAY	hsa05010:Alzheimer's disease	6	0.0140842	0.091096	ATP5E, NDUFA6, CYC1, CYCS, ATP5O, GAPDH	99	168	6879	2.4816	0.999999	0.785376	67.8232
KEGG_PATHWAY	hsa00900:Terpenoid backbone biosynthesis	4	0.00938945	0.00354743	DHDDS, HMGCR, PMVK, IDI1	99	22	6879	12.6336	0.402674	0.227131	4.1311
